# Supplementary material for: Evidence for inhibition of HIF-1α prolyl hydroxylase 3 activity by four biologically active tetraazamacrocycles
Source: Royal Society of Chemistry journal article supplement (doi:10.1039/c2ob07076f), 2012-01-01
Supplement: c2ob07076f.pdf [file c2ob07076f.pdf]

## Electronic Supplementary Information

### **Evidence for inhibition of HIF-1 $\alpha$ Prolyl hydroxylase 3 activity by four biological active tetraazamacrocycles**

*Jing Cao, Zhirong Geng, Xiaoyan Ma, Jinghan Wen, Yuxin Yin, Zhilin Wang\**

State Key Laboratory of Coordination Chemistry, School of Chemistry and Chemical Engineering, Nanjing University, Nanjing 210093, PR China. Tel.: +86-25-83686082; Fax: +86-25-83317761. E-mail: [wangzl@nju.edu.cn](mailto:wangzl@nju.edu.cn)

## 1. Experimental Details

### (1) Details of activity reaction procedure

The reaction mixture contained 1 mM DTT, 0.6 mg/mL catalase, 2 mM ascorbate, 2 mg/mL BSA, 50  $\mu$ M FeCl<sub>2</sub> (prepared as 500 mM stock in 20 mM HCl and diluted with water), HIF 19 peptide, enzyme and 20 mM PBS, pH 7.0, to a final volume of 96  $\mu$ L, keeping on ice bath. The reaction was initiated by addition of 4  $\mu$ L 600  $\mu$ M 2OG to the reaction mixture. After warming to 37 °C for 20 min, the reaction was quenched by addition of 200  $\mu$ L 0.5 M HCl. Derivatization was then achieved by the addition of 1 mL 1 mg/mL OPD in 0.5 M HCl and heating for 15 min at 75 °C. After centrifugation for 5 min (12000 rpm), the supernatant was stored at 4 °C for no more than 1 hour, then made basic by the addition of 1 mL 1.175 M NaOH for fluorescence detection.

### (2) The preparation of compounds **1-4**

For use in enzyme activity assay and spectrometry studies, compounds **1**, **2** and **4** were prepared as 5 mM stock in Milli-Q deionized water and stored at 4 °C. **3** is prepared as 10 mM stock in acetonitrile and diluted with Milli-Q deionized water at room temperature.

## 2. Supplemented Figures

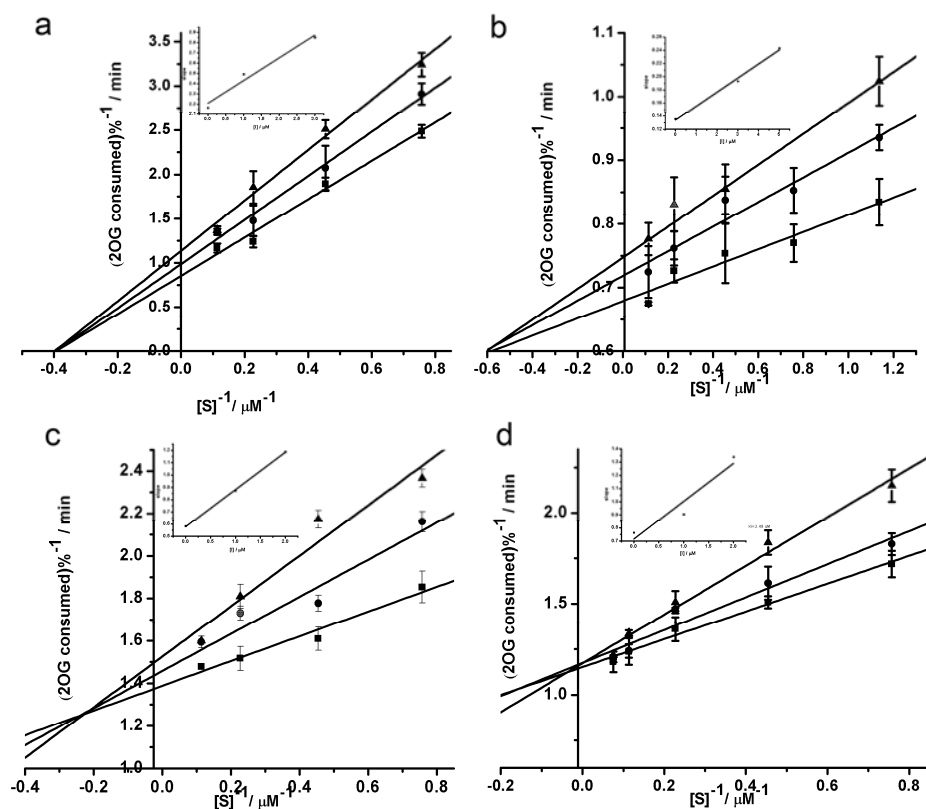

**Fig. S1.** Double reciprocal plots for the inhibition of hydroxylation activity by macrocyclic polyamines **1-4**. a Plots for **1** concentration of 0  $\mu\text{M}$  ( $\blacksquare$ ), 1  $\mu\text{M}$  ( $\bullet$ ), 3  $\mu\text{M}$  ( $\blacktriangle$ ). b Plots for **2** concentration of 0  $\mu\text{M}$  ( $\blacksquare$ ), 3  $\mu\text{M}$  ( $\bullet$ ) and 5  $\mu\text{M}$  ( $\blacktriangle$ ). c Plots for **3** concentration of 0  $\mu\text{M}$  ( $\blacksquare$ ), 1  $\mu\text{M}$  ( $\bullet$ ), 2  $\mu\text{M}$  ( $\blacktriangle$ ). d Plots for **4** concentration of 0  $\mu\text{M}$  ( $\blacksquare$ ), 1  $\mu\text{M}$  ( $\bullet$ ) and 2  $\mu\text{M}$  ( $\blacktriangle$ ). (inset) Replot of slopes versus concentration of inhibitors. Data were analyzed as mean  $\pm$  S.D. of three independent experiments.

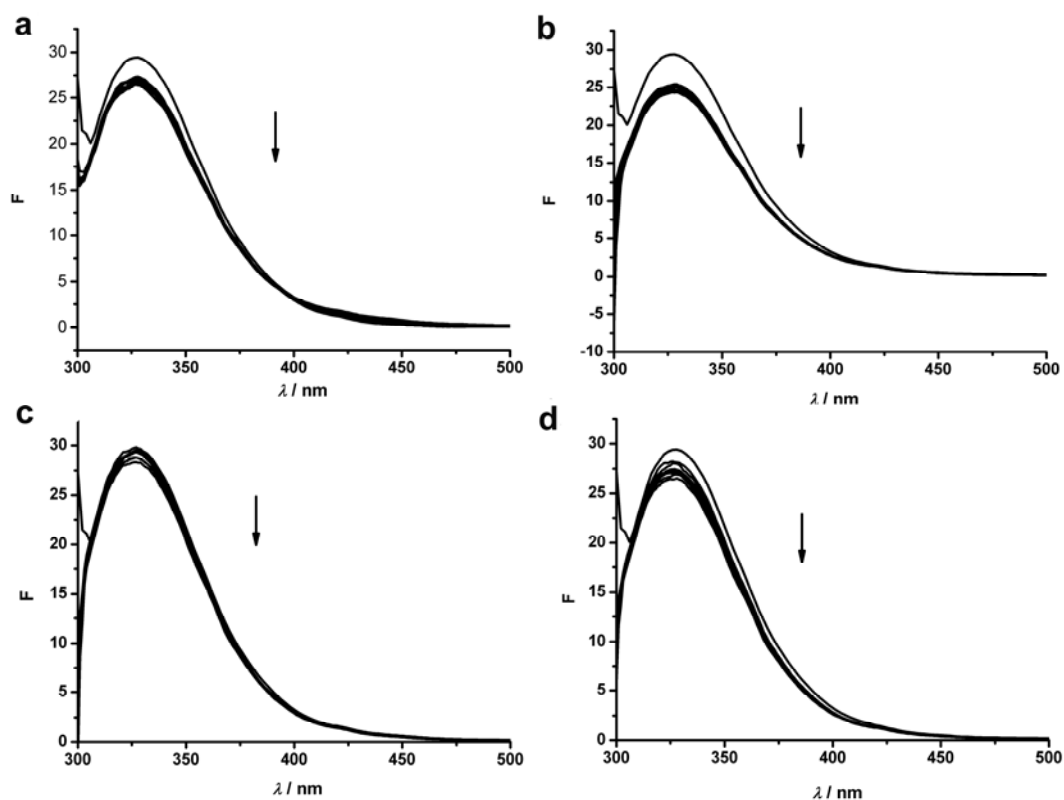

**Fig. S2.** Fluorescence emission spectra of PHD3 with increasing amounts of a **1**, b **2**, c **3** and d **4** in 50 mM PBS (pH 7.0) at 37 °C.  $\lambda$  (excitation) was 280 nm and maximum  $\lambda$  (emission) was 330 nm, respectively. The data indicates that the inhibitors have little effects on the fluorescence of the enzyme with absence of  $\text{Fe}^{2+}$ .

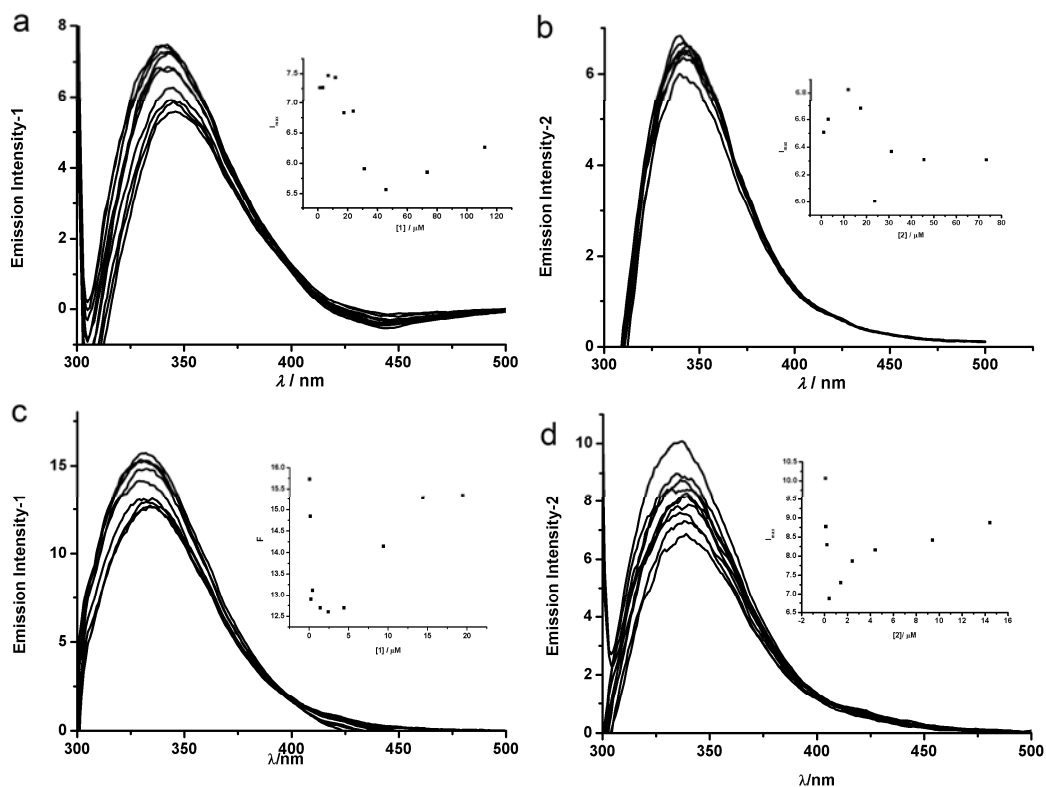

**Fig. S3.** Fluorescence emission spectra of PHD3-Fe<sup>2+</sup> (a, b) and PHD3-Fe<sup>2+</sup>-2OG (c, d) mixtures with increasing amounts of 1(a, c) and 2 (b, d) in 50 mM PBS (pH 7.0) at 37 °C.  $\lambda$  (excitation) was 280 nm. Inset: Effects of 1 (a,c) and 2 (b,d) on the maximum fluorescence emission intensity of PHD3-Fe<sup>2+</sup> and PHD3-Fe<sup>2+</sup>-2OG mixtures.

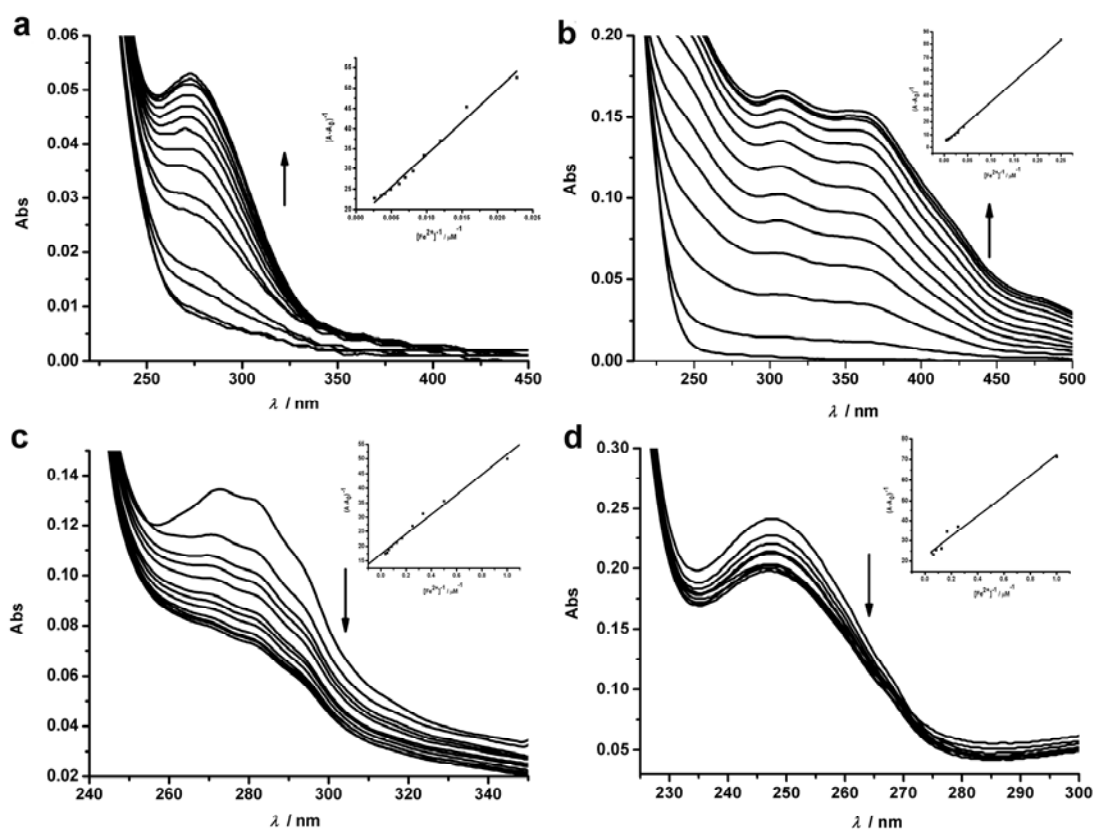

**Fig. S4.** Change in absorption spectra of a **1**, b **2**, c **3** and d **4** measured upon addition of  $Fe^{2+}$ . The concentrations of **1-4** were 130, 140, 25, 50  $\mu M$ , respectively. The amounts of  $Fe^{2+}$  used for titration were from  $10^{-4}$ - $10^{-2}$  M. (inset) Determination of association constant ( $K_a$ ) via Benesi-Hildebrand plot of  $\lambda_{max}$ . The four compounds coordinates with  $Fe^{2+}$  in a 1:1 stoichiometry, according to linear fit of Benesi-Hildebrand equation<sup>1</sup> (Eq S1).

$$1/(A-A_0)=1/[K_a*[L]*(A-A_0)]+1/(A-A_0) \text{ (S1)}$$

1. H. A. Benesi and J. H. Hildebrand, *J. Am. Chem. Soc.*, 1949, **71**, 2703-2707.

### 3. Computationally Optimized Energy and Coordinates

(1) Energy of optimized model for the complex of 4-iron and residues of first coordination shell of PHD3 active site (a. u.)

-1990.7722236 a. u.

(2) Coordinates of optimized model for the complex of 4-iron and residues of first coordination shell of PHD3 active site:

Standard orientation:

| Center<br>Number | Atomic<br>Number | Atomic<br>Type | Coordinates (Angstroms) |           |           |
|------------------|------------------|----------------|-------------------------|-----------|-----------|
|                  |                  |                | X                       | Y         | Z         |
| 1                | 6                | 0              | 4.724335                | -1.738123 | -0.215215 |
| 2                | 6                | 0              | 3.461462                | -1.387963 | 0.256063  |
| 3                | 7                | 0              | 2.795785                | -0.356304 | -0.324343 |
| 4                | 6                | 0              | 3.163631                | 0.145828  | -1.532142 |
| 5                | 6                | 0              | 4.414428                | -0.170830 | -2.054437 |
| 6                | 6                | 0              | 5.227809                | -1.065068 | -1.339107 |
| 7                | 6                | 0              | 2.519121                | -2.186001 | 1.155491  |
| 8                | 6                | 0              | 1.964848                | 0.772405  | -2.252684 |
| 9                | 7                | 0              | 1.168892                | -2.020499 | 0.408147  |
| 10               | 6                | 0              | -0.026698               | -2.806814 | 0.861088  |
| 11               | 6                | 0              | -1.046977               | -2.877671 | -0.292924 |
| 12               | 7                | 0              | -1.631664               | -1.543709 | -0.730101 |
| 13               | 6                | 0              | -1.460734               | -1.032453 | -2.130671 |
| 14               | 6                | 0              | -0.589993               | 0.245399  | -2.246012 |
| 15               | 7                | 0              | 0.780326                | -0.027416 | -1.690225 |
| 16               | 16               | 0              | -3.238998               | -1.329976 | -0.040263 |

|    |    |   |           |           |           |
|----|----|---|-----------|-----------|-----------|
| 17 | 8  | 0 | -3.197709 | -1.622905 | 1.499303  |
| 18 | 8  | 0 | -4.417261 | -1.883465 | -0.938736 |
| 19 | 1  | 0 | 5.283541  | -2.543723 | 0.243236  |
| 20 | 1  | 0 | 4.734296  | 0.222276  | -3.011233 |
| 21 | 1  | 0 | 6.212870  | -1.311838 | -1.715204 |
| 22 | 1  | 0 | 2.820391  | -3.236329 | 1.218777  |
| 23 | 1  | 0 | 2.386464  | -1.741656 | 2.141840  |
| 24 | 1  | 0 | 2.058352  | 0.650067  | -3.337653 |
| 25 | 1  | 0 | 1.803369  | 1.821454  | -2.008384 |
| 26 | 1  | 0 | 1.374638  | -2.358630 | -0.546046 |
| 27 | 1  | 0 | 0.251247  | -3.839554 | 1.112540  |
| 28 | 1  | 0 | -0.477665 | -2.340110 | 1.731998  |
| 29 | 1  | 0 | -0.577146 | -3.301876 | -1.188171 |
| 30 | 1  | 0 | -1.843461 | -3.570977 | -0.000530 |
| 31 | 1  | 0 | -2.438592 | -0.850157 | -2.590292 |
| 32 | 1  | 0 | -1.000757 | -1.840701 | -2.712585 |
| 33 | 1  | 0 | -0.538538 | 0.504393  | -3.312771 |
| 34 | 1  | 0 | -1.025371 | 1.075135  | -1.692730 |
| 35 | 1  | 0 | 0.996652  | -1.004140 | -1.941676 |
| 36 | 26 | 0 | 1.052618  | 0.039396  | 0.348608  |
| 37 | 8  | 0 | -0.763286 | 0.280697  | 1.380839  |
| 38 | 7  | 0 | 1.371265  | 2.060445  | 0.496133  |
| 39 | 6  | 0 | -0.145724 | -0.089893 | 2.486475  |
| 40 | 8  | 0 | 1.142343  | -0.126923 | 2.406004  |
| 41 | 6  | 0 | -0.887123 | -0.539892 | 3.730786  |
| 42 | 7  | 0 | 1.116222  | 4.156126  | 1.187194  |
| 43 | 1  | 0 | -1.853209 | -0.957203 | 3.440982  |
| 44 | 1  | 0 | -0.279219 | -1.266074 | 4.273065  |
| 45 | 1  | 0 | -1.062279 | 0.314934  | 4.396694  |
| 46 | 1  | 0 | 0.688888  | 4.984653  | 1.587331  |



|    |   |   |           |          |           |
|----|---|---|-----------|----------|-----------|
| 47 | 7 | 0 | -3.540894 | 0.537190 | -0.418659 |
| 48 | 6 | 0 | -2.878717 | 1.711355 | -0.037290 |
| 49 | 1 | 0 | -1.998840 | 1.634975 | 0.580802  |
| 50 | 6 | 0 | -3.596088 | 2.747751 | -0.575310 |
| 51 | 1 | 0 | -3.443925 | 3.816306 | -0.569910 |
| 52 | 6 | 0 | -4.645772 | 0.835628 | -1.134354 |
| 53 | 1 | 0 | -5.343641 | 0.114715 | -1.523857 |
| 54 | 6 | 0 | 2.485620  | 2.829057 | 0.087075  |
| 55 | 1 | 0 | 3.323552  | 2.395861 | -0.423253 |
| 56 | 6 | 0 | 2.325536  | 4.125803 | 0.497026  |
| 57 | 1 | 0 | 2.937029  | 5.001849 | 0.337654  |
| 58 | 6 | 0 | 0.574273  | 2.901905 | 1.172441  |
| 59 | 1 | 0 | -0.335543 | 2.627853 | 1.667803  |
| 60 | 7 | 0 | -4.688914 | 2.173874 | -1.246211 |
| 61 | 1 | 0 | -5.406444 | 2.694101 | -1.748648 |

---

#### 4. Table S1

Selected bond lengths (Å) and angles (°) of the computational model

| Bond length |       | Bond angles |        |
|-------------|-------|-------------|--------|
| N1-Fe       | 1.910 | O3-Fe-O4    | 63.761 |
| N2-Fe       | 2.064 | N5-Fe-O3    | 89.187 |
| N4-Fe       | 2.058 | N4-Fe-N5    | 97.110 |
| N5-Fe       | 2.051 | N4-Fe-N1    | 76.409 |
| O3-Fe       | 2.103 | N1-Fe-N2    | 75.639 |
| O4-Fe       | 2.066 | N2-Fe-O4    | 83.599 |

## 5. Table S2

Average log P of compounds **1-4** calculated by **ALOGPS 2.1 program** from **Virtual Computational Chemistry Laboratory<sup>2</sup>**.

| Inhibitors | Average logP |
|------------|--------------|
| 1          | -4.58±1.93   |
| 2          | -0.92±0.91   |
| 3          | 7.68±1.15    |
| 4          | 1.68±0.57    |

2. I. V. Tetko, J. Gasteiger, R. Todeschini, A. Mauri, D. Livingstone, P. Ertl, V. A. Palyulin, E. V. Radchenko, N. S. Zefirov, A. S. Makarenko, V. Y. Tanchuk and V. V. Prokopenko, *J. Comput. Aided. Mol. Des.*, 2005, 19, 453-463.
